# Supplementary material for: Vertically aligned hematite nanosheets with (110) facets controllably exposed for ammonia synthesis with high Faraday efficiency beyond 2.5 A cm−2
Source: Royal Society of Chemistry journal article supplement (doi:10.1039/d4ee03987d), 2024-01-01
Supplement: d4ee03987d1.pdf [file d4ee03987d1.pdf]

## Supporting Information

### **Vertically aligned hematite nanosheets with (110) facets controllably exposed for ammonia synthesis with high faraday efficiency beyond 2.5 A cm<sup>-2</sup>**

Jinfeng Liu,<sup>†a</sup> Shiwen Du,<sup>†b</sup> Wenjun Fan,<sup>a</sup> Qinglin Li,<sup>a</sup> Qi Yang,<sup>a</sup> Lin Luo,<sup>a</sup> Jiangnan Li<sup>a</sup> and Fuxiang Zhang<sup>\*a</sup>

a. State Key Laboratory of Catalysis, Dalian Institute of Chemical Physics, Chinese Academy of Sciences, Dalian National Laboratory for Clean Energy, Dalian 116023, Liaoning, China.

b. School of Physics and Materials Engineering, Dalian Minzu University, Dalian 116600, China.

## Experimental Procedures

### Materials and Chemicals.

Potassium hydroxide (KOH,  $\geq 99.0\%$ ), iron nitrate nonahydrate ( $\text{Fe}(\text{NO}_3)_3 \cdot 9\text{H}_2\text{O}$ , ACS grade), potassium nitrate ( $\text{KNO}_3$ , 99%), potassium nitrite ( $\text{KNO}_2$ , 99.99%), ethanol ( $\geq 99.5\%$ ), Nafion aqueous solution (5.0 wt.%), ammonium chloride ( $\text{NH}_4\text{Cl}$ , 99.99%), sodium hypochlorite solution ( $\text{NaClO}$ ), hydrochloric acid (HCl 36 wt%), Carbon paper was used as a substrate which was cleaned by ultrasonic assisted washing with isopropanol/ethanol/DI water step by step before utilization.

### Preparation of the $\text{Fe}_2\text{O}_3$ nanosheets arrays electrocatalysts

$\text{Fe}_2\text{O}_3$  nanosheets (denoted as  $\text{Fe}_2\text{O}_3\text{-NS}$ ) arrays electrocatalysts were synthesized by one in-situ electrochemical reconstruction on its  $\text{Fe}_2\text{O}_3$  nanorods (denoted as  $\text{Fe}_2\text{O}_3\text{-NR}$ ) which was synthesized through typical hydrothermal method and subsequent by a simple calcination. In detail, 1 mmol of  $\text{Fe}(\text{NO}_3)_3 \cdot 9\text{H}_2\text{O}$  and 1 mmol of  $\text{Na}_2\text{SO}_4$  were added in 30 mL of  $\text{H}_2\text{O}$  under the ultrasonic until to form a transparent solution. Then a pretreated carbon cloth ( $2 \times 3 \text{ cm}^2$ ) and the mixed solution were transferred into a Teflon-lined autoclave, which was sealed and kept at a constant temperature of  $120 \text{ }^\circ\text{C}$  for 6 h. After that, the resultant samples were fully rinsed with water and dried overnight under vacuum. Finally, the red brown  $\text{Fe}_2\text{O}_3$  catalyst was obtained by annealing the precursor at  $400 \text{ }^\circ\text{C}$  for 2 h with a heating rate of  $1 \text{ }^\circ\text{C min}^{-1}$  under a nitrogen atmosphere. Subsequently, the samples were activated in 1 M KOH and 0.1 M  $\text{KNO}_3$  by a continuous 20 cycles CV sweeping at a rate of  $50 \text{ mV s}^{-1}$  from 0 to  $-0.5 \text{ V}$  vs. RHE for the structural reconstruction. The electrocatalyst mass loading of  $\text{Fe}_2\text{O}_3\text{-NS}$  was ca.  $0.6 \text{ mg cm}^{-2}$ .

### The synthesis of $\text{Fe}_2\text{O}_3$ NP electrocatalyst

For comparison, the  $\text{Fe}_2\text{O}_3$  nanoparticles were prepared by the calcination of  $\text{Fe}(\text{NO}_3)_3$  under a constant temperature of  $400 \text{ }^\circ\text{C}$  for 2h in atmosphere with a heating rate of  $1 \text{ }^\circ\text{C min}^{-1}$ . The resulted sample was regarded as  $\text{Fe}_2\text{O}_3\text{-NP}$ .

## **Characterization**

Powder X-ray diffraction patterns were performed on a SmartLab X-ray powder diffractometer with Cu K $\alpha$  radiation ( $\lambda=0.154178$  nm). Scanning electron microscopy (SEM) images were taken by JSM-7900F. A Hitachi HT7700 was used for low-resolution TEM images, and a JEM 2100 was used to take the HRTEM images. XPS measurements were taken by a Thermo ESCALAB 250Xi with monochromatized Al K $\alpha$  source (15 kV, 10.8 mA). The calibration of binding energies obtained in the XPS spectral analysis were performed by referencing C 1s to 284.8 eV.

## **XAS measurement**

XAS experiments were carried by the 1W1B beamline of Beijing Synchrotron Radiation Facility (BSRF). The in-situ electrochemistry XAS data were measured in a solution mixed with 1 M KOH and 0.1 M KNO<sub>3</sub> in a homemade electrochemical cell which contains a catalyst-coated graphene paper, Hg/HgO (filled with 1 M KOH solution) electrode, and a Pt wire as the working electrode, reference electrode counter electrode, respectively. In-situ XAS measurements were carried in fluorescence mode by a Lytle detector and the corresponding reference samples were collected in transmission mode. All the electrochemical measurements were carried on a CHI 760E workstation. The acquired XAFS data were processed according to the standard procedures using the ATHENA module of Demeter software packages.

## **Electrochemical Measurements**

All the performances of nitrate electroreduction were performed on a Gamry electrochemical workstation in a H-type cell separated by Nafion 117 membrane under room temperature and pressure. A three-electrode configuration contains a Hg/HgO (filled with 1 M KOH solution) as the electrode reference a, a platinum foil as counter electrode and a working electrode were used for nitrate reduction measurements. The surface of working electrode was 0.118 cm<sup>2</sup>. For electrocatalytic NO<sub>3</sub><sup>-</sup> reduction, 40 mL of electrolyte solution contain 1M KOH and 0.1M KNO<sub>3</sub> was used as the cathode

and anode compartment, respectively. The electrolyte was purged with high-purity Ar for 20 min before the measurement to remove the dissolved oxygen. The LSV curves were performed at a rate of 10 mV s<sup>-1</sup>. The potentiostatic tests were carried in the constant potentials for 20 min at a constant stirring rate. High-purity Ar was continuously fed into the cathodic compartment during the experiments. The stability experiments of electrocatalytic reduction of nitrate to ammonia was conducted in a self-made continuous flow H-cell with a three-electrode system (Figure S12). Two reagent bottles filled with 10 L of electrolyte solution are connected to the cathode and anode, respectively. The anode is filled with a 1 M KOH solution, and the cathode is filled with a mixture containing 1 M KOH and 0.1 M KNO<sub>3</sub>. The corresponding electrolyte solutions for the cathode and anode are circulated through a flow pump at a rate of 10 mL per minute. All measured potentials were calculated with respect to the RHE by the following equation:

$$E_{\text{RHE}} = E_{\text{Hg/HgO}} + 0.0591 * \text{pH} + 0.098 - 0.9 * i * R_s \quad (1)$$

where  $i$  is the current and  $R_s$  regards as the solution resistance determined by electrochemical impedance spectroscopy (EIS).

Electrochemical active surface area (EASA) measurements were tested on a CHI 760E potentiostat. The cyclic voltammetry curves were taken in open circuit potential around  $\pm 50$  mV at the different scan rates in a mixed solution of 1M KOH and 0.1 M KNO<sub>3</sub> purified with high-purity Ar. The plot of current density at set potential against scan rate has a linear relationship and its slope is the  $C_{dl}$ . The specific capacitance of a flat surface was assumed as 60  $\mu\text{F cm}^{-2}$ .

$$S_{\text{ECSA}} = \frac{C_{dl}}{60 \mu\text{F cm}^{-2}}$$

Electrochemical impedance spectroscopy (EIS) was carried out at a Solartron electrochemical workstation at -0.35 V versus RHE with a frequency range of 0.01 - 10<sup>6</sup> Hz for each catalyst in the mixed solution containing 1M KOH and 0.1 M KNO<sub>3</sub>.

### **In-situ FTIR measurement**

In-situ Fourier Transform Infrared Spectroscopy (FTIR) with attenuated total reflection (ATR) configuration was employed to study the adsorption of intermediates during the electroreduction of nitrate to ammonia. Surface Enhanced Infrared Absorption Spectroscopy (SEIRAS) tests were conducted using a full-band high-resolution infrared spectrometer (SHIMADZU IRTracer-100). The working electrode was prepared by uniformly drop-casting the catalysts onto a hemicylindrical silicon prism coated with a thin film of gold. A Pt wire and a Hg/HgO electrode served as the counter and reference electrodes, respectively. Before the test, argon (Ar) was continuously bubbled into the electrolyte including 1M KOH and 0.1M KNO<sub>3</sub> to remove dissolved O<sub>2</sub>. The incident angle of the IR beam on the reflection plane of the electrode was approximately 60°. The spectra resolution is 16 cm<sup>-1</sup> for all measurements. The electrochemical data were recorded on the CHI760E working station with a three-electrode system.

### **Determination and quantitation of NH<sub>3</sub>**

The produced NH<sub>3</sub> was determined by the indophenol blue method. Detailly, the target electrolyte solution (2 mL) was moved into a clean vessel. Sequentially, adding 2 mL of 1M NaOH solution containing 5 wt% salicylic acid and 5 wt% sodium citrate, followed by the addition of 1 mL of 0.05 M NaClO and 200 uL of 1.0 wt% sodium nitroferricyanide (C<sub>5</sub>FeN<sub>6</sub>Na<sub>2</sub>O) solution. After 2h in dark at room temperature, the absorption spectrum was measured by using a UV-vis spectrophotometer (UV-2600). The absorbance wavelength of 655 nm was chosen to determine the formation of indophenol blue. To accurately quantify the produced NH<sub>3</sub>, concentration-absorbance standard curve was established by a series of standard ammonia chloride in 1M KOH and 0.1M KNO<sub>3</sub> solutions.

### **Determination and quantitation of nitrite**

The produced NO<sub>2</sub><sup>-</sup> was determined by the Griess test. 1 g p-aminobenzenesulfonamide was disperse in 100 mL of 3 M HCl solution (marked solution A). Then, 0.1 g N-(1-Naphthyl)ethylenediamine dihydrochloride was dissolve

in 100 mL ultrapure water as the color reagent (marked solution B). Sequentially, 1mL solution A and B are added in the target electrolyte solution (2 mL). The absorption intensity at a wavelength of 540nm was recorded after 10 min. The concentration-absorbance curves were calibrated using a series of standard  $\text{KNO}_2$  in the solution of 1 M KOH and 0.1 M  $\text{KNO}_3$ .

### Calculation of the faradaic efficiency and yield rate of $\text{NH}_3$ .

The faradaic efficiency (FE) of electrocatalytic  $\text{NO}_3^-$  conversion was calculated as follows:

$$FE_{\text{NH}_3} = (8 \times F \times C_{\text{NH}_3} \times V) / (17 \times Q)$$

$$FE_{\text{NO}_2^-} = (8 \times F \times C_{\text{NO}_2^-} \times V) / (46 \times Q)$$

The yield rate of  $\text{NH}_3$  was calculated using the following equation:

$$Y_{\text{NH}_3} = (C_{\text{NH}_3} \times V) / (t \times S)$$

where F is the Faraday constant ( $96,485 \text{ C mol}^{-1}$ ),  $C_{\text{NH}_3}$  is the measured  $\text{NH}_3$  concentration, V is the volume of the cathodic electrolyte, Q is the total charge passing the electrode, t is the reduction time, and S is the surface area of working electrode.

For  $\text{H}_2$  products, the Faradaic efficiency (FE) was measured as follows:

$$\begin{aligned} FE_{\text{H}_2} (\%) \\ = \frac{i_{\text{H}_2}}{i_{\text{total}}} \times 100\% &= X_{\text{H}_2} \times f \times N_A \times \frac{F}{i_{\text{total}}} \times 100\% \quad (2) \end{aligned}$$

Where  $i_{\text{H}_2}$  represent as the partial current of  $\text{H}_2$ ,  $i_{\text{total}}$  is the total current, f is the Ar flow rate ( $\text{mol s}^{-1}$ ),  $N_A$  is the number of exchanged electrons to produce species g from  $\text{H}_2$ , and the F is Faraday constant ( $96485 \text{ C mol}^{-1}$ ).

### $^{15}\text{N}$ isotope-labeling experiment

An isotope-labeling experiment using mixed solution of 1 M KOH and 40 mM  $\text{K}^{15}\text{NO}_3$  (98 atom%  $^{15}\text{N}$ ) as the electrolyte was carried out by 1H nuclear magnetic resonance (NMR, 400 MHz) to clarify the source of  $\text{NH}_3$ . The  $\text{D-H}_2\text{O}$  as a solvent and maleic acid ( $\text{C}_4\text{H}_4\text{O}_4$ ) as the internal standard. 400  $\mu\text{L}$  of the electrolyte solution was

mixed with 100 uL D-H<sub>2</sub>O (with 0.04 wt% C<sub>4</sub>H<sub>4</sub>O<sub>4</sub>). After <sup>15</sup>NO<sub>3</sub><sup>-</sup> electroreduction at -0.35 V (vs. RHE), the obtained <sup>15</sup>NH<sub>4</sub><sup>+</sup> was test. <sup>14</sup>NH<sub>4</sub><sup>+</sup> was obtained at the same process as that of <sup>15</sup>NH<sub>4</sub><sup>+</sup> except that the K<sup>15</sup>NO<sub>3</sub> was replaced by K<sup>14</sup>NO<sub>3</sub>

### The half-cell energy efficiency for producing NH<sub>3</sub>

The half-cell energy efficiency (EE) was defined as the ratio of fuel energy to applied electrical power, which was calculated with the following equation:

$$E.E. (NH_3) = \frac{(1.23 - E_{NH_3}^0) \times F.E.(NH_3)}{1.23 - E} \times 100\%$$

Where  $E_{NH_3}^0$  is the standard electrode potential (0.69 V) of nitrate electroreduction to ammonia in alkaline media, FE(NH<sub>3</sub>) is the faradaic efficiency for NH<sub>3</sub>; 1.23 V is the equilibrium potential of water oxidation (assuming the overpotential of the water oxidation is zero); E is the applied potential for the production of NH<sub>3</sub>.

### Calculation details

Density functional theory (DFT) calculations were conducted using the Vienna Ab Initio Simulation Package (VASP). The method of the Perdew-Burke-Ernzerh (PBE) of generalized gradient approximation (GGA) functional was utilized to describe the electronic exchange-correlation potential. DFT+U method was used to account for the Fe 3d electrons with the effective Hubbard U value of 4.3 eV according to the previous report. The periodic slabs with three layers of (110) and (104) crystal faces for Fe<sub>2</sub>O<sub>3</sub> were built to evaluate their surface reactions. Meanwhile, a vacuum layer of 15 Å is applied for all the calculated slab models. The kinetic-energy cutoff was set as 500 eV to ensure all atoms except the bottom layer were fully relaxed for each system. The Monkhorst-Pack meshes of 2 × 3 × 1 and 1 × 2 × 1 were used in Brillouin zone sampling for the (110) and (104) slabs, respectively. Energy and force will not reach convergence until lower to 1.0×10<sup>-5</sup> eV and 0.015 eV/Å, respectively. The adsorption energy ΔE of molecule A on the substrate surface is defined as

$$\Delta E = E_{*A} - (E_* + E_A)$$

where  $E_{*A}$ ,  $E_A$ , and  $E_*$  denote the energies of surface-adsorbed molecule A, free molecule A, and the bare substrate, respectively.

The Gibbs free energy change ( $\Delta G$ ) for each elementary step as follows:

$$\Delta G = \Delta E + \Delta E_{ZPE} - T\Delta S$$

where  $\Delta E$  is the adsorption energy,  $\Delta E_{ZPE}$  is the zero-point energy difference and  $\Delta S$  is the entropy difference between the gas phase and adsorbed state.

### **Assembly of the Zn-NO<sub>3</sub><sup>-</sup> battery**

The Fe<sub>2</sub>O<sub>3</sub>-NS and Zn plate were employed as the cathode and anode for Zn-NO<sub>3</sub><sup>-</sup> battery, respectively. A typical H-type cell that contains 40 mL cathode electrolyte (1 M NaOH + 0.1M NO<sub>3</sub><sup>-</sup>) and 40 mL anode electrolyte (5 M NaOH) separated by a bipolar membrane. The discharging polarization curves with a scan rate of 5 mV s<sup>-1</sup> and galvanostatic tests were conducted using CHI 760E workstation at room temperature, respectively. After electrochemical test, the electrolyte was diluted to a certain concentration for the next products detection. The power density (P) of Zn-NO<sub>3</sub><sup>-</sup> battery was determined by  $P = I \times V$ , where I and V are the discharge current density and voltage, respectively. The electrochemical reactions in Zn-NO<sub>3</sub><sup>-</sup> battery were presented as following:

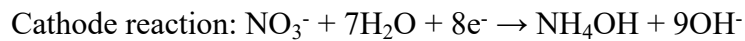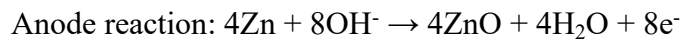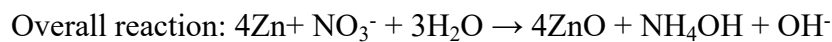



## Supplementary Figures and Tables

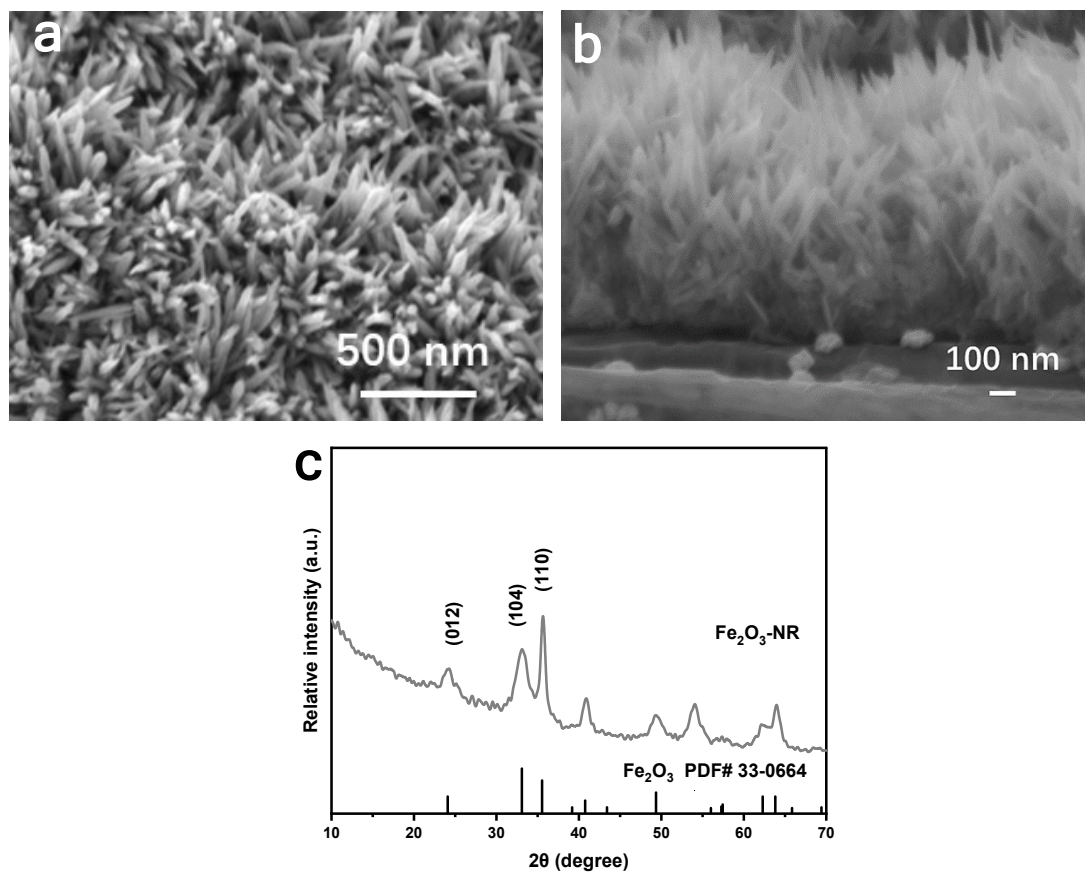

**Figure S1.** Structural characterizations of  $\text{Fe}_2\text{O}_3$ -NR: (a, b) SEM image and (c) XRD pattern.

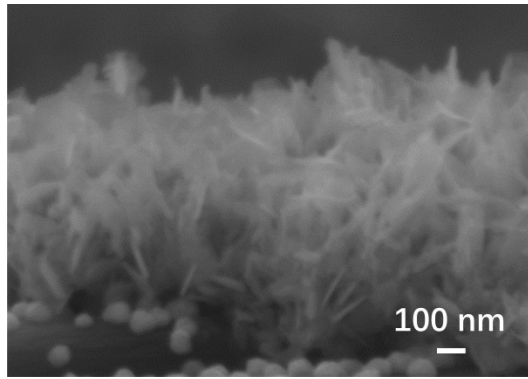

**Figure S2.** The SEM image of cross-sectional view of Fe<sub>2</sub>O<sub>3</sub>-NS.

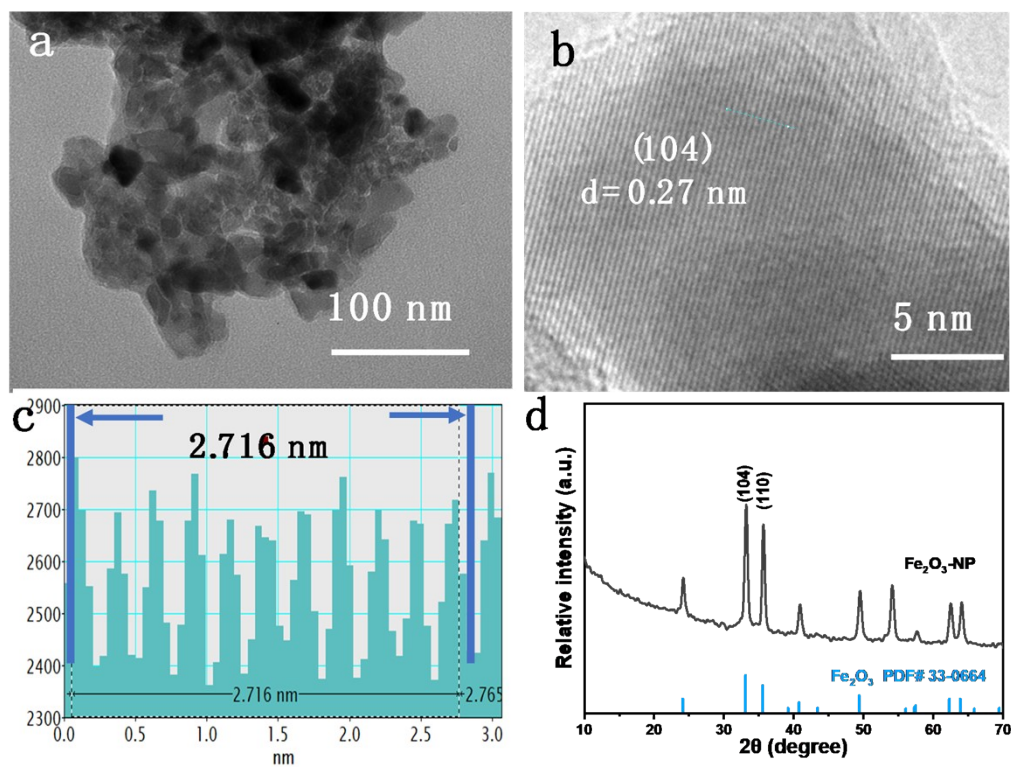

**Figure S3.** Structural characterizations of  $\text{Fe}_2\text{O}_3\text{-NP}$  catalyst: (a) TEM image, (b, c) high resolution TEM, and (d) XRD pattern.

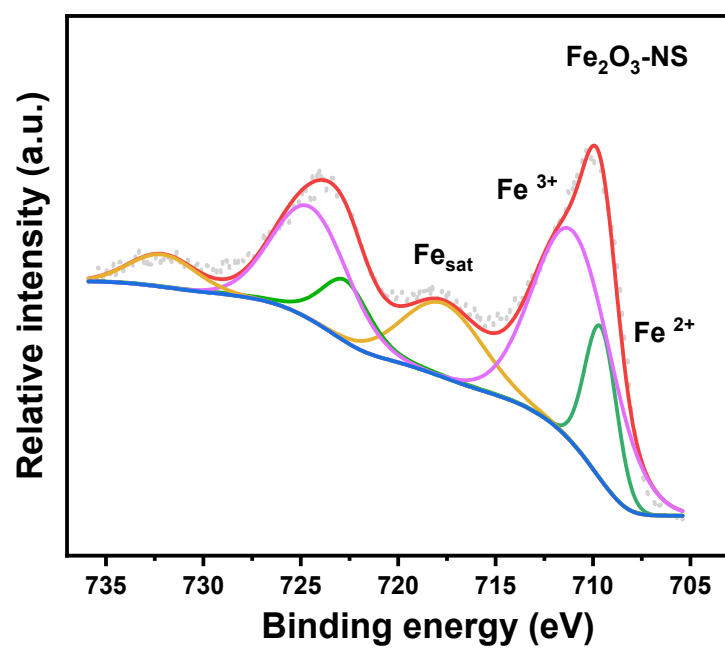

**Figure S4.** XPS spectra of the Fe<sub>2</sub>O<sub>3</sub>-NS arrays electrocatalyst for Fe 2p.

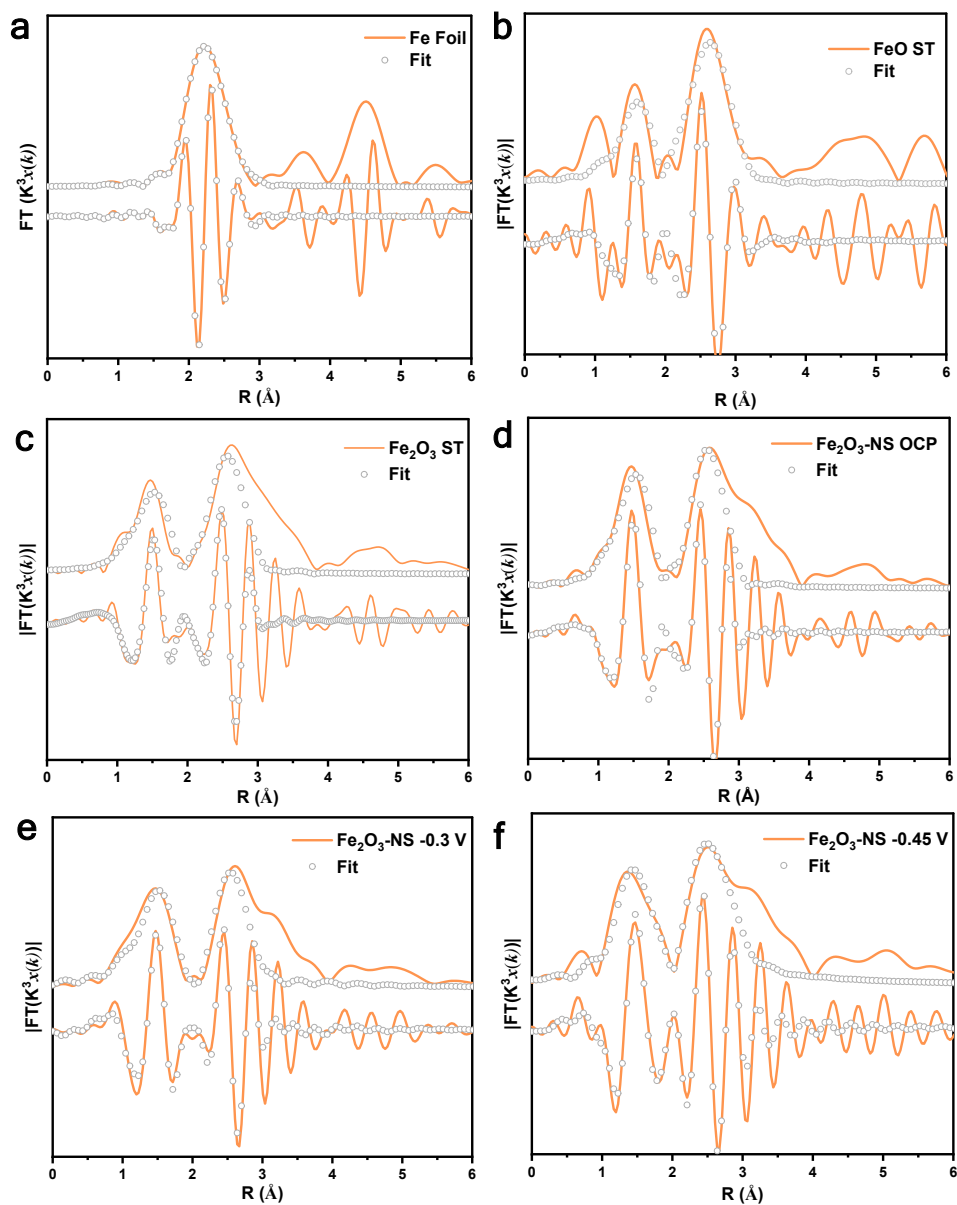

**Figure S5.** FT-EXAFS fitting spectra for (a) Fe foil, (b) FeO standard sample, (c) Fe<sub>2</sub>O<sub>3</sub> standard sample, (d) Fe<sub>2</sub>O<sub>3</sub>-NS array catalyst, (e) Fe<sub>2</sub>O<sub>3</sub>-NS -0.3 V and (f) Fe<sub>2</sub>O<sub>3</sub>-NS -0.45 V in R space.

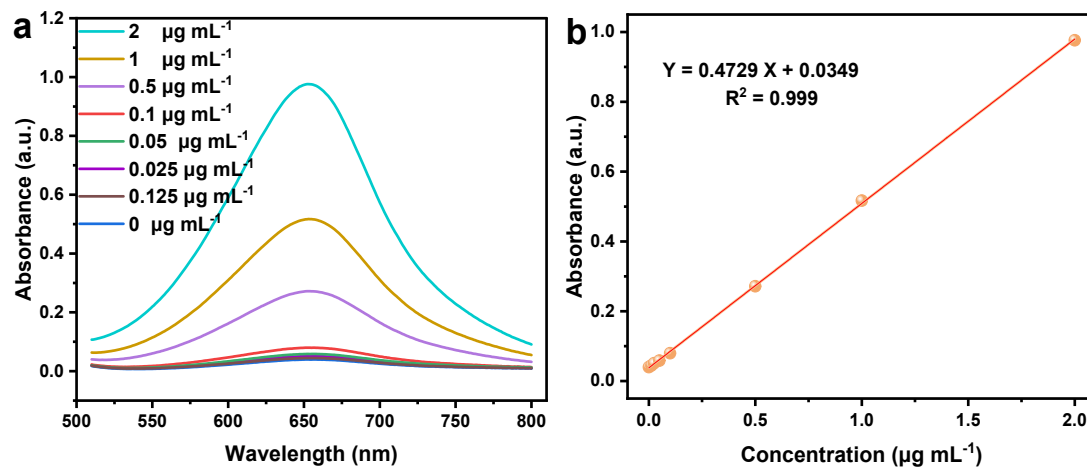

**Figure S6.** (a) The UV-visible absorption spectra of the standard solutions of  $\text{NH}_4^+$ , (b) calibration curve used for estimation of  $\text{NH}_3$ .

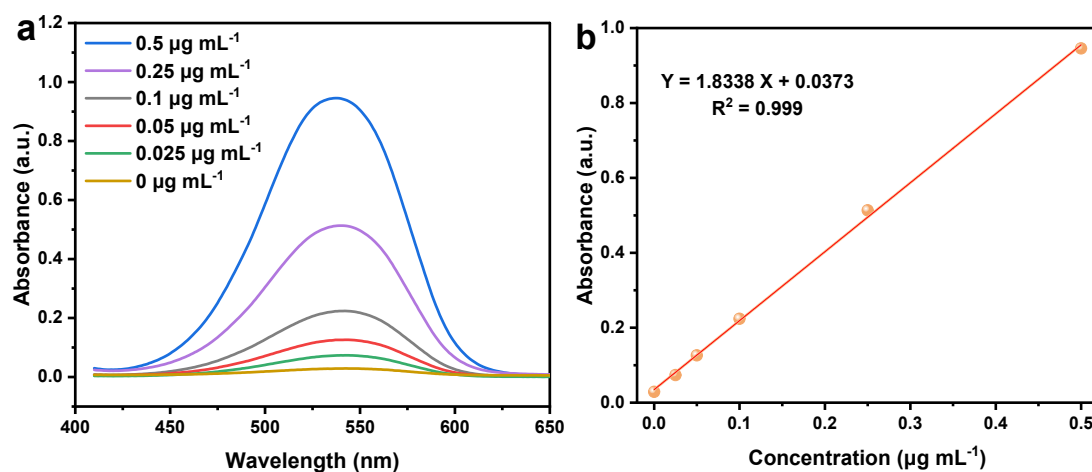

**Figure S7.** (a) The UV-visible absorption spectra of the standard solutions of  $\text{NO}_2^-$ , (b) calibration curve used for estimation of  $\text{NO}_2^-$  in the solution of 1 M KOH and 0.1 M  $\text{KNO}_3$ .

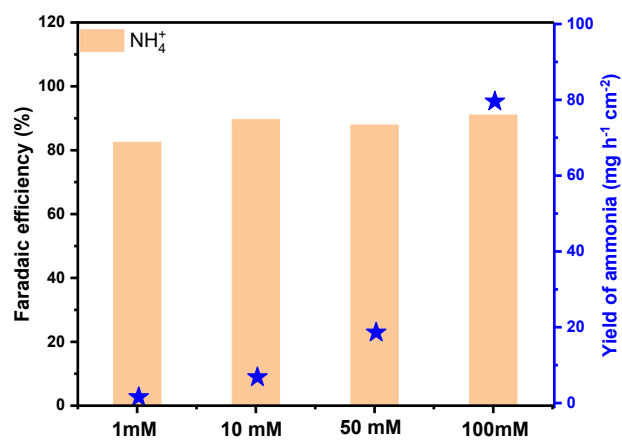

**Figure S8.** The faradaic efficiency and yield rate of ammonia for  $\text{Fe}_2\text{O}_3$ -NS arrays catalyst tested in the various concentrations of  $\text{KNO}_3$ .



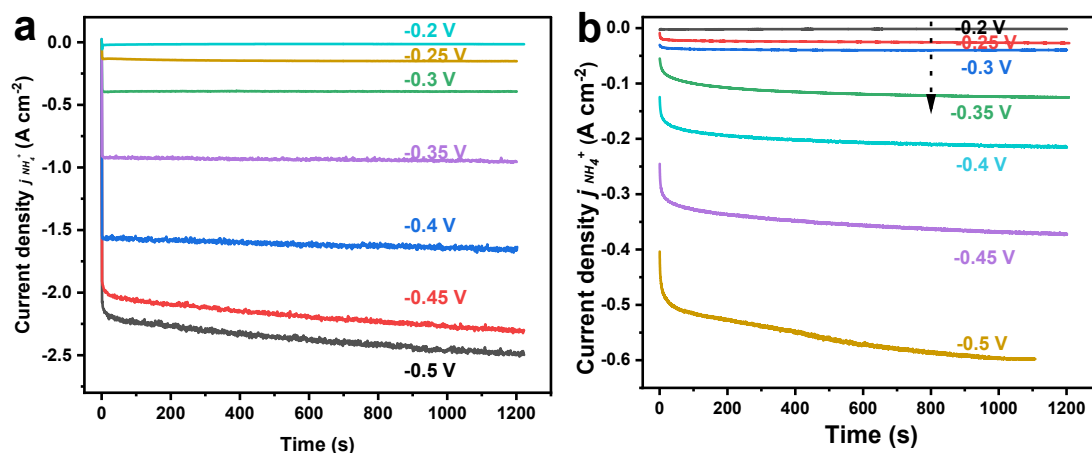

**Figure S9.** The partial current density of ammonia for (a)  $\text{Fe}_2\text{O}_3$ -NS arrays, and (b)  $\text{Fe}_2\text{O}_3$ -NP catalysts at the given potentials in the mixture solution of 1M KOH and 0.1 M  $\text{KNO}_3$ .

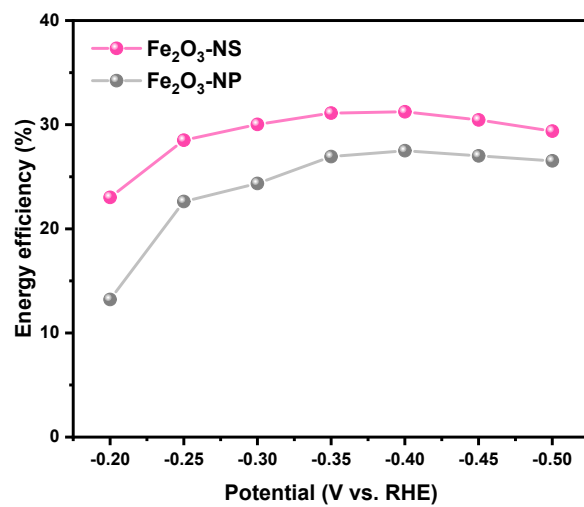

**Figure S10.** The energy efficiency of Fe<sub>2</sub>O<sub>3</sub>-NS arrays and Fe<sub>2</sub>O<sub>3</sub>-NP catalysts under the corresponding potentials.

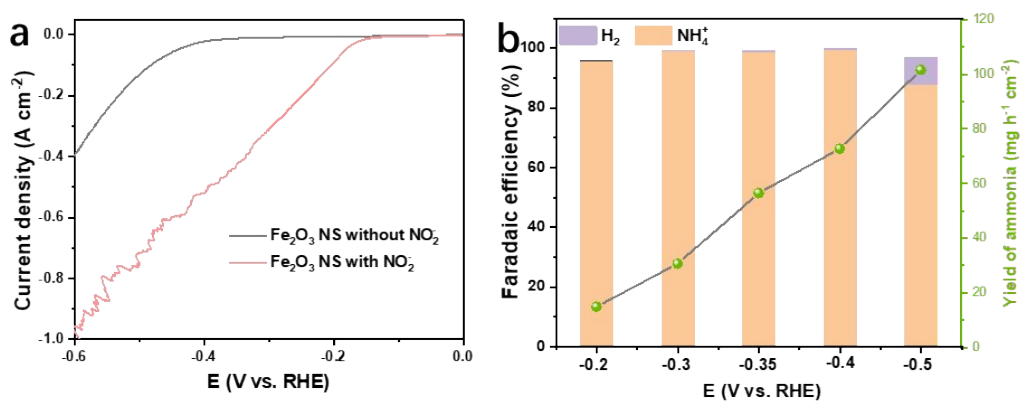

**Figure S11.** (a) LSV curves of Fe<sub>2</sub>O<sub>3</sub> NS in 1M KOH electrolyte and 0.10 M KNO<sub>2</sub>/1 M KOH mixed electrolyte, (b) the faradaic efficiency the yield rate of ammonia of Fe<sub>2</sub>O<sub>3</sub> NS in the 0.10 M KNO<sub>2</sub>/1 M KOH mixed electrolyte.

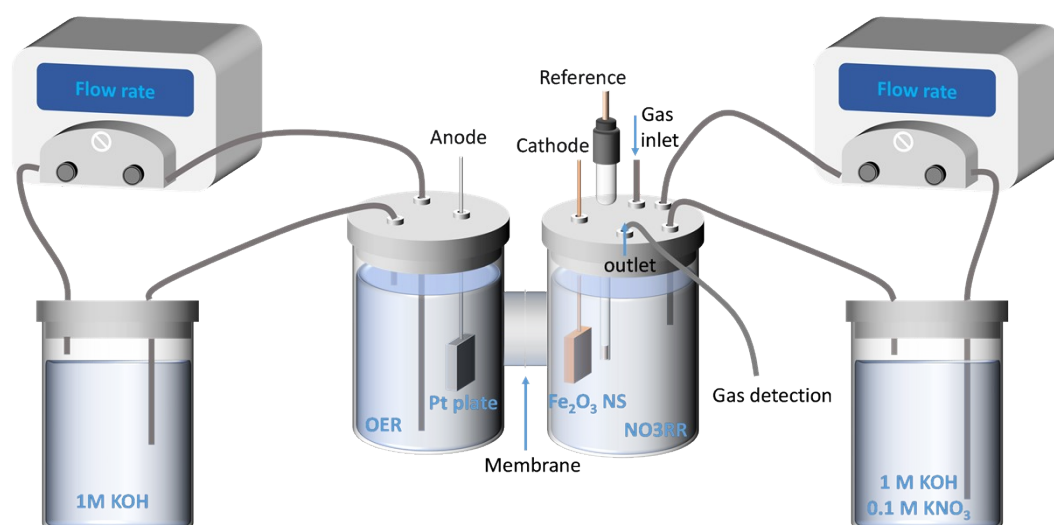

**Figure S12.** The illustration of home-made continuous flow H-cell for long-term stability of the electrocatalytic reduction of nitrate to ammonia. The flow rates of anode and cathode are 10 mL<sup>-1</sup>, respectively.

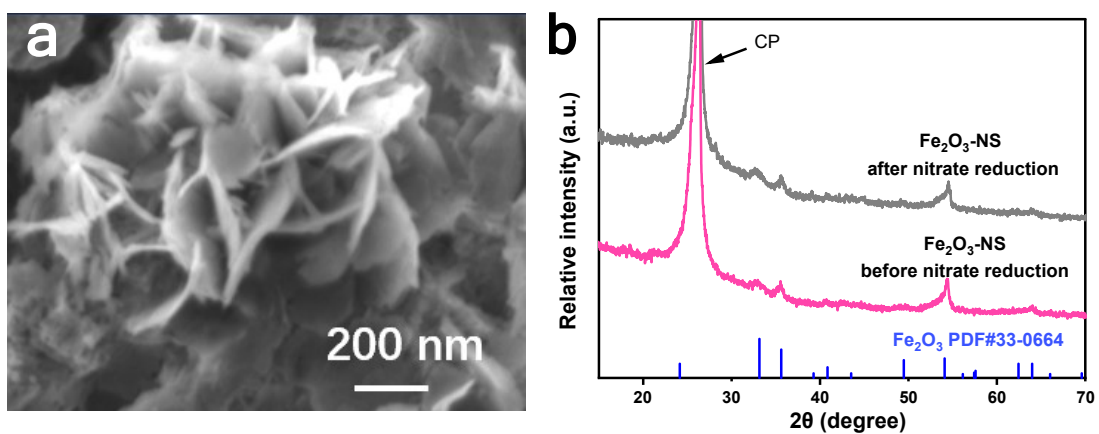

**Figure S13.** The morphology and structure characterization of Fe<sub>2</sub>O<sub>3</sub>-NS arrays after the electrocatalytic nitrate reduction. (a) SEM image, (b) XRD patterns.

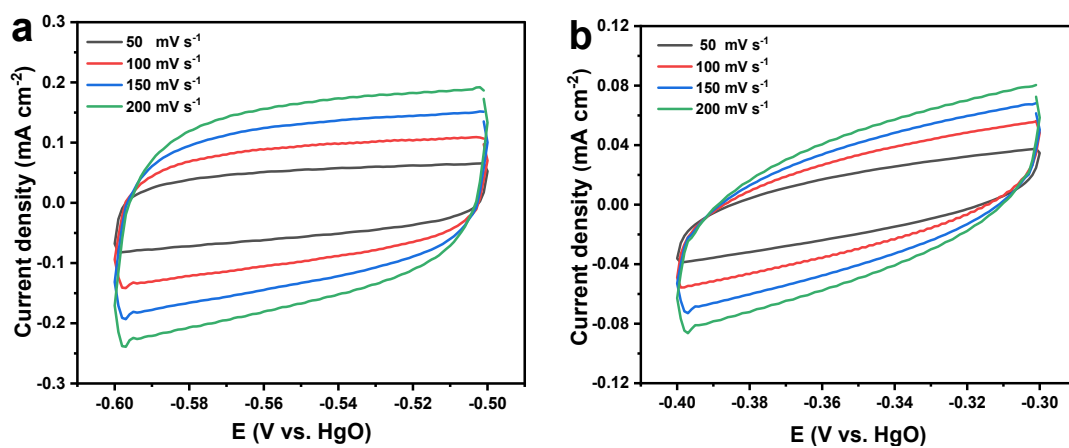

**Figure S14.** CV curves of (a) Fe<sub>2</sub>O<sub>3</sub>-NS arrays, (b) Fe<sub>2</sub>O<sub>3</sub>-NP obtained in the non-Faradaic region with various scan rates from 50 to 200 mV s<sup>-1</sup>.

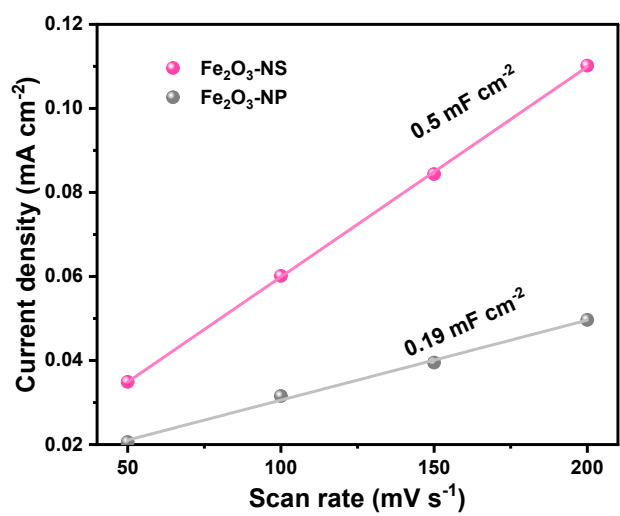

**Figure S15.** (a) Double-layer capacitance ( $C_{dl}$ ) of Fe<sub>2</sub>O<sub>3</sub>-NS arrays and Fe<sub>2</sub>O<sub>3</sub>-NP catalysts.

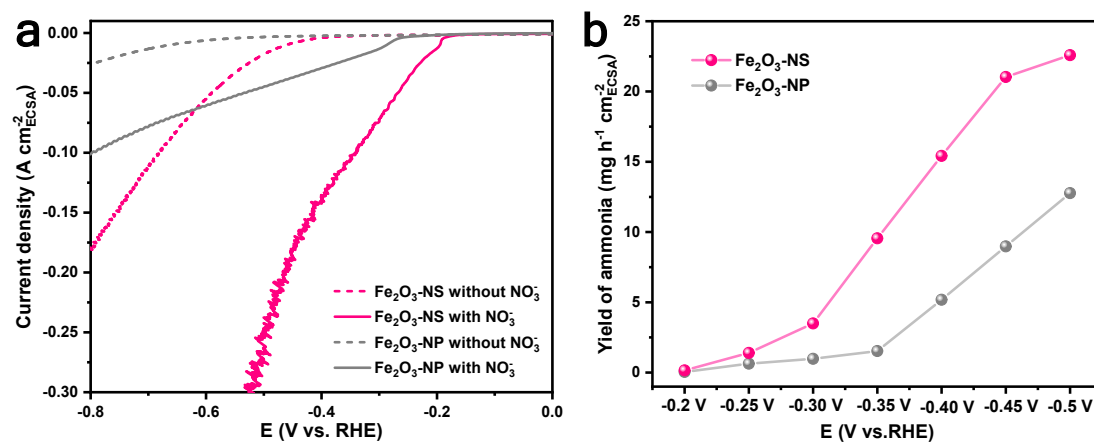

**Figure S16.** (a) The LSV curves and (b) the yield rate of ammonia normalized to the electrochemical active surface area (EASA) for the Fe<sub>2</sub>O<sub>3</sub>-NS arrays and Fe<sub>2</sub>O<sub>3</sub>-NP catalysts.



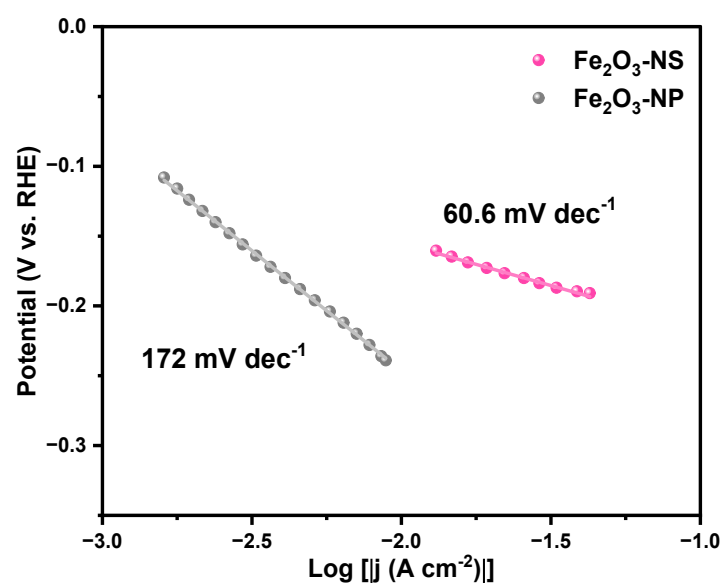

**Figure S17.** Tafel plots of Fe<sub>2</sub>O<sub>3</sub>-NS arrays and Fe<sub>2</sub>O<sub>3</sub>-NP catalysts.

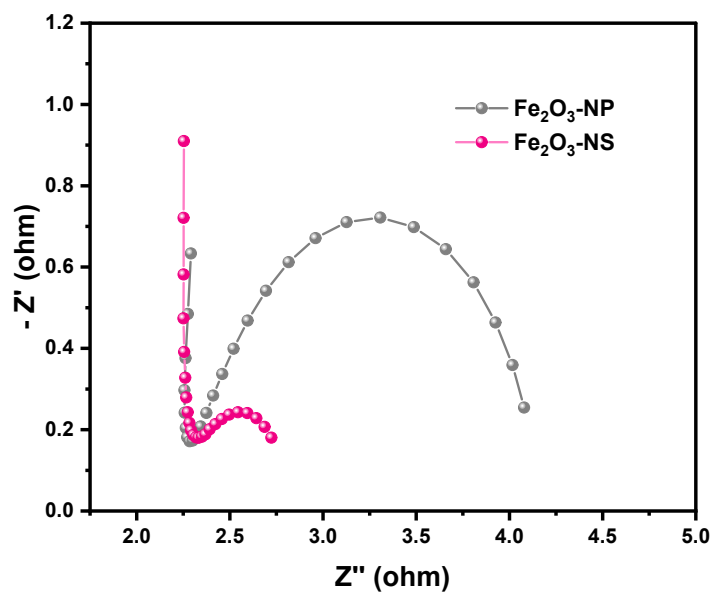

**Figure S18.** Electrochemical impedance spectroscopy (EIS) of the Fe<sub>2</sub>O<sub>3</sub>-NS and Fe<sub>2</sub>O<sub>3</sub>-NP under the applied potential of -0.35 V vs. RHE

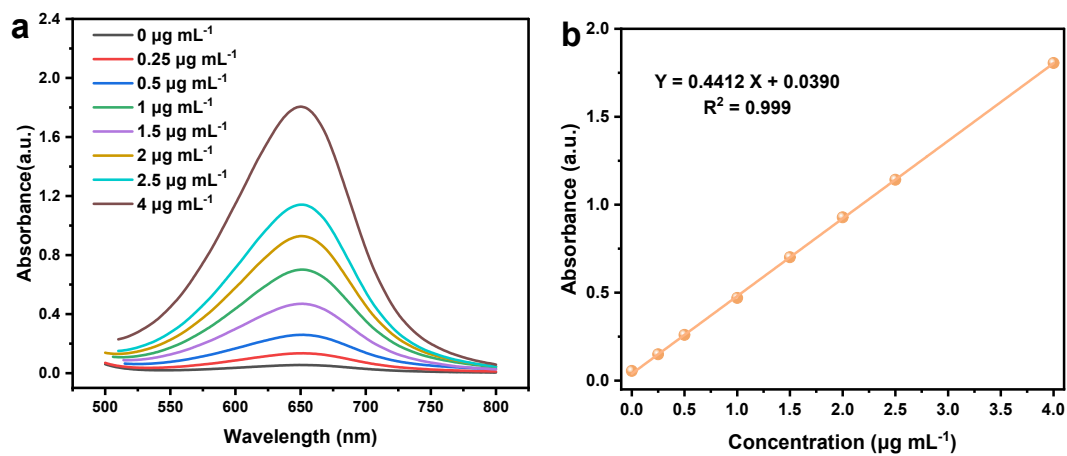

**Figure S19.** (a) The UV-visible absorption spectra of the standard solutions of  $\text{NH}_4^+$  in the solution containing of KOH and  $\text{KNO}_2$ , (b) calibration curve used for estimation of  $\text{NH}_3$  by  $\text{NH}_4^+$  ions of different concentrations.

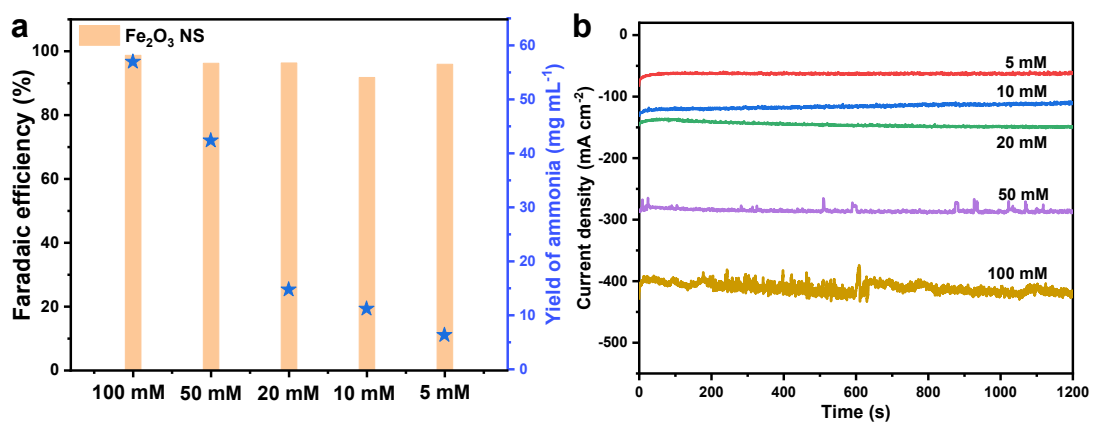

**Figure S20.** (a) The faradaic efficiency and the yield rate of ammonia for Fe<sub>2</sub>O<sub>3</sub>-NS sample at the various concentrations of KNO<sub>2</sub>, (b) the total current density of ammonia for Fe<sub>2</sub>O<sub>3</sub>-NS at various concentrations of KNO<sub>2</sub>.

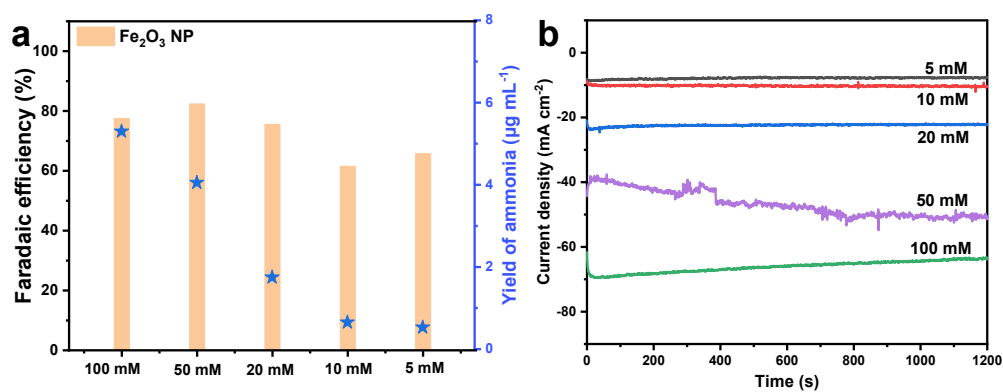

**Figure S21.** (a) The faradaic efficiency and the yield rate of ammonia for Fe<sub>2</sub>O<sub>3</sub>-NP sample at the various concentrations of KNO<sub>2</sub>, (b) the total current density of ammonia for Fe<sub>2</sub>O<sub>3</sub>-NP at various concentrations of KNO<sub>2</sub>.

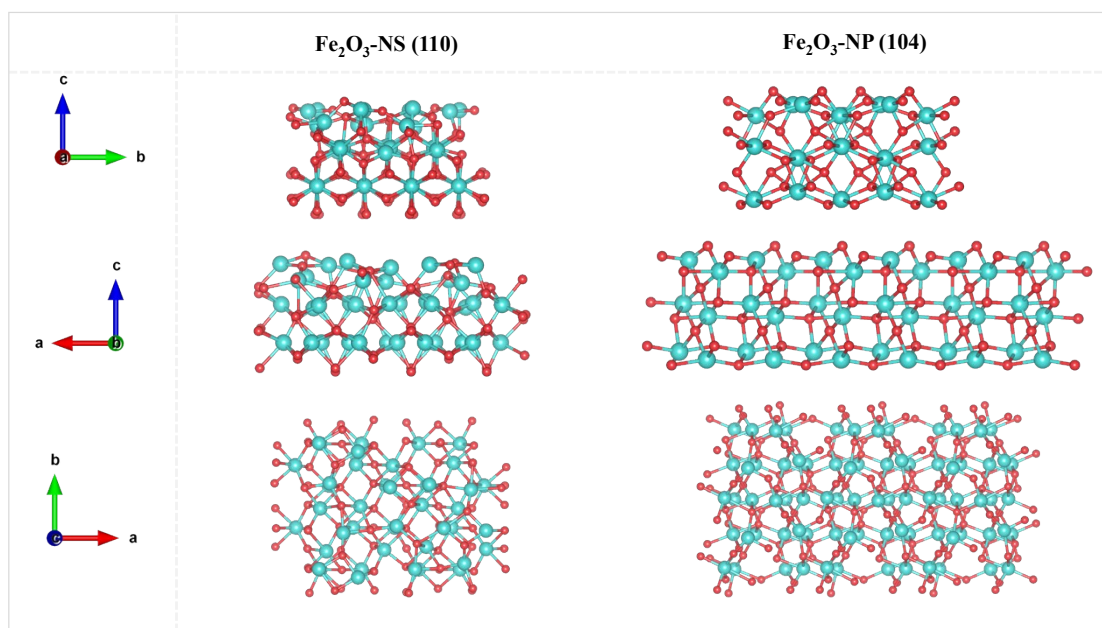

**Figure S22.** The crystallographic mode of  $\text{Fe}_2\text{O}_3\text{-NS (110)}$  and  $\text{Fe}_2\text{O}_3\text{-NP (104)}$  view from different axial directions.

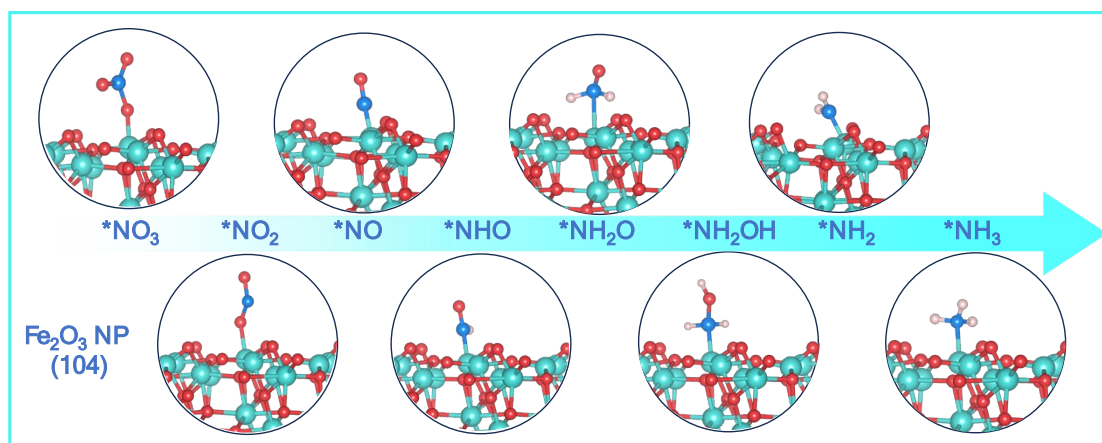

**Figure S23.** The simplified structures of various  $\text{NO}_3^-$  reduction reaction intermediates on  $\text{Fe}_2\text{O}_3$ -NP (104) electrocatalyst.

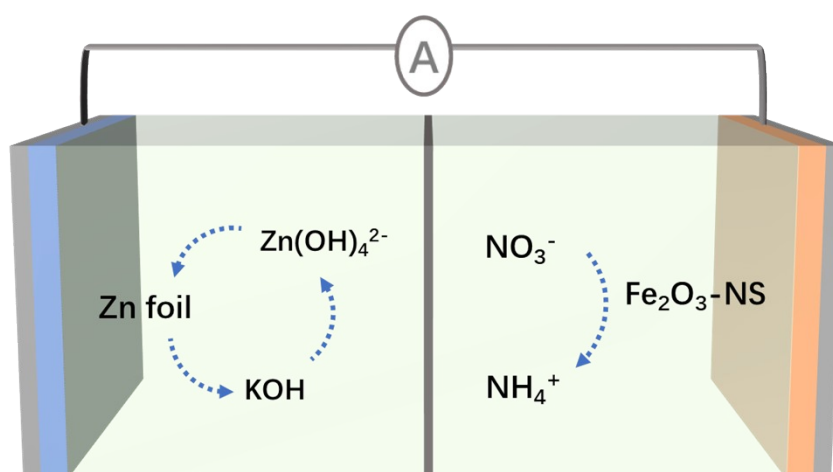

**Figure S24.** Schematic illustration of a Zn-nitrate battery.



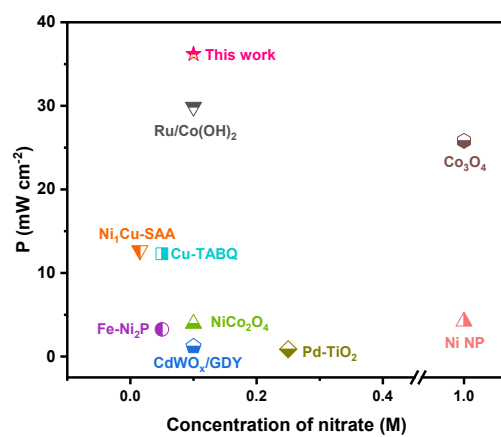

**Figure S25.** The comparison of Zn-nitrate battery performance using the Fe<sub>2</sub>O<sub>3</sub>-NS catalyst or other reported catalysts as cathodes.

**Table S1.** Fitting parameters of Fe K-edge EXAFS curves for different samples.

| Samples                                   | Path  | N | R       | $\sigma^2$ | $\Delta E$ | R(factor) |
|-------------------------------------------|-------|---|---------|------------|------------|-----------|
| Fe-foil                                   | Fe-O  | 6 | 2.4676  | 0.0053     | 5.132      | 0.0039    |
|                                           | Fe-Fe | 6 | 2.8448  | 0.0080     | 5.132      |           |
| FeO-ST                                    | Fe-O  | 1 | 2.0882  | 0.0074     | 1.974      | 0.0353    |
|                                           | Fe-Fe | 1 | 3.06614 | 0.0204     | 1.974      |           |
| Fe <sub>2</sub> O <sub>3</sub> -ST        | Fe-O  | 1 | 2.98563 | 0.0116     | 1.318      | 0.0242    |
|                                           | Fe-Fe | 1 | 2.01539 | 0.0115     | 1.318      |           |
| Fe <sub>2</sub> O <sub>3</sub> -NS-OCP    | Fe-O  | 1 | 2.0000  | 0.0096     | 2.847      | 0.0197    |
|                                           | Fe-Fe | 1 | 2.9611  | 0.0095     | 2.847      |           |
| Fe <sub>2</sub> O <sub>3</sub> -NS-0.3 V  | Fe-O  | 1 | 1.9916  | 0.0119     | 1.744      | 0.0146    |
|                                           | Fe-Fe | 1 | 2.9477  | 0.0087     | 1.744      |           |
| Fe <sub>2</sub> O <sub>3</sub> -NS-0.45 V | Fe-O  | 1 | 1.9993  | 0.0122     | 1.855      | 0.0151    |
|                                           | Fe-Fe | 1 | 2.9459  | 0.0057     | 1.855      |           |

N, coordination number; R, distance between absorber and backscatter atoms;  $\sigma^2$ , DebyeWaller factor to account for both thermal and structural disorders;  $\Delta E_0$ , inner potential correction; R factor (%) indicates the goodness of the fit.  $S_0^2$  was fixed to 0.97 as determined from Fe foil fitting.

**Table S2.** The essential parameters of ammonia synthesis of Fe<sub>2</sub>O<sub>3</sub>-NS compared with other catalysts.

| Catalysts                                     | electrolytes                                                         | Yield rate of NH <sub>3</sub><br>(mg cm <sup>-2</sup> h <sup>-1</sup> ) | FE<br>% | EE<br>% | Ref.         |
|-----------------------------------------------|----------------------------------------------------------------------|-------------------------------------------------------------------------|---------|---------|--------------|
| Fe <sub>2</sub> O <sub>3</sub> -NS            | 1 M KOH<br>0.1 M KNO <sub>3</sub>                                    | 128.41                                                                  | 94.3    | 31.24   | This<br>work |
|                                               |                                                                      | 175.19                                                                  | 95      | 30.54   |              |
|                                               |                                                                      | 188.17                                                                  | 94.1    | 29.38   |              |
| Fe <sub>2</sub> O <sub>3</sub>                | 0.5 M Na <sub>2</sub> SO <sub>4</sub><br>0.1 M NaNO <sub>3</sub>     | 5.576                                                                   | 69.76   | 17.69   | [1]          |
| Fe <sub>2</sub> O <sub>3</sub> /Fe-N-<br>C    | 1 M KOH<br>0.16 M KNO <sub>3</sub>                                   | 153                                                                     | 100     | 22.2    | [2]          |
| Fe <sub>3</sub> O <sub>4</sub>                | 1 M KOH<br>0.1 M KNO <sub>3</sub>                                    | 9.5                                                                     | 90      | 28.09   | [3]          |
| A <sup>5</sup> Fe <sub>2</sub> O <sub>4</sub> | 1 M KOH<br>0.1 M KNO <sub>3</sub>                                    | 27.3                                                                    | 98.1    | 30.6    | [4]          |
| Fe SACs                                       | 0.10M K <sub>2</sub> SO <sub>4</sub><br>0.50M KNO <sub>3</sub>       | 5.25                                                                    | 75      | 21.43   | [5]          |
| Fe-PPY<br>SACs                                | 0.1 M KOH<br>0.1 M KNO <sub>3</sub>                                  | 2.01                                                                    | 100     | 29.51   | [6]          |
| Fe-Cyano                                      | 1 M KOH<br>10 mM KNO <sub>3</sub>                                    | 42.1                                                                    | 90      | 28.09   | [7]          |
| Cu-Fe <sub>2</sub> O <sub>3</sub>             | 0.1 M KOH<br>0.1 M KNO <sub>3</sub>                                  | 7.186                                                                   | 100     | 29.51   | [8]          |
| Co-<br>Fe@Fe <sub>2</sub> O <sub>3</sub>      | 0.1M Na <sub>2</sub> SO <sub>4</sub><br>500 ppm<br>NaNO <sub>3</sub> | 0.88                                                                    | 85.2    | 23.24   | [9]          |
| Fe-NiP                                        | 0.2 M K <sub>2</sub> SO <sub>4</sub><br>50 mM KNO <sub>3</sub>       | 4                                                                       | 93      | 30.81   | [10]         |
| Bi-FeS <sub>2</sub>                           | 1 M KOH<br>0.1 M NaNO <sub>3</sub>                                   | 21.9                                                                    | 98.5    | 27.56   | [11]         |

---

|                                        |                                                                  |       |      |       |      |
|----------------------------------------|------------------------------------------------------------------|-------|------|-------|------|
| <b>RuFe-FeNC</b>                       | 0.5 M Na <sub>2</sub> SO <sub>4</sub><br>0.1 M NaNO <sub>3</sub> | 11.88 | 92.1 | 18.91 | [12] |
| <b>Fe-Cu HNG</b>                       | 0.10 M KNO <sub>3</sub> ,<br>1.0 M KOH                           | 4.41  | 92.5 | 32.64 | [13] |
| <b>FePc</b>                            | 0.1 M K <sub>2</sub> SO <sub>4</sub><br>0.5 M KNO <sub>3</sub>   | 35.07 | 100  | 19.78 | [14] |
| <b>Mo<sub>2</sub>CT<sub>x</sub>:Fe</b> | 0.5 M Na <sub>2</sub> SO <sub>4</sub><br>0.1 M NaNO <sub>3</sub> | 0.043 | 70   | 20.65 | [15] |

---

**Table S3.** Calculated reaction energy of elementary reactions involved in NO<sub>3</sub>RR on Fe<sub>2</sub>O<sub>3</sub>-NS (110).

| <b>Fe<sub>2</sub>O<sub>3</sub>-NS(110)</b> | <b>E</b>   | <b>ZPE</b> | <b>T/K</b> | <b>G</b>   |
|--------------------------------------------|------------|------------|------------|------------|
|                                            | <b>eV</b>  |            |            | <b>eV</b>  |
| <b>Cat. * NO<sub>3</sub><sup>-</sup></b>   | -465.61715 | -23.04344  | 298        | -519.28309 |
| <b>*NO<sub>3</sub></b>                     | -492.89230 | 0.31851    | 298        | -523.19629 |
| <b>*NO<sub>2</sub></b>                     | -487.27767 | 0.23578    | 298        | -525.08039 |
| <b>*NO</b>                                 | -480.51958 | 0.15584    | 298        | -525.81824 |
| <b>*NHO</b>                                | -484.77835 | 0.48295    | 298        | -526.34740 |
| <b>*NH<sub>2</sub>O</b>                    | -488.92201 | 0.80072    | 298        | -526.77079 |
| <b>*NH<sub>2</sub>OH</b>                   | -495.07885 | 0.99947    | 298        | -529.32638 |
| <b>*NH<sub>2</sub></b>                     | -483.34959 | 0.69407    | 298        | -528.72102 |
| <b>*NH<sub>3</sub></b>                     | -487.28832 | 0.95795    | 298        | -528.99337 |

**Table S4.** Calculated reaction energy of elementary reactions involved in NO<sub>3</sub>RR on Fe<sub>2</sub>O<sub>3</sub>-NP (104).

| <b>Fe<sub>2</sub>O<sub>3</sub>-NP<br/>(104)</b> | <b>E<br/>eV</b> | <b>ZPE</b> | <b>T<br/>K</b> | <b>G<br/>eV</b> |
|-------------------------------------------------|-----------------|------------|----------------|-----------------|
| <b>Cat. * NO<sub>3</sub><sup>-</sup></b>        | -999.50971      | -23.04344  | 298            | -2.11803        |
| <b>*NO<sub>3</sub></b>                          | -1024.93720     | 0.26602    | 298            | -1.78775        |
| <b>*NO<sub>2</sub></b>                          | -1019.18830     | 0.14537    | 298            | -2.44522        |
| <b>*NO</b>                                      | -1014.21440     | 0.14225    | 298            | -0.06481        |
| <b>*NHO</b>                                     | -1017.98380     | 0.44434    | 298            | -1.85167        |
| <b>*NH<sub>2</sub>O</b>                         | -1023.58480     | 0.79117    | 298            | 0.78177         |
| <b>*NH<sub>2</sub>OH</b>                        | -1026.47660     | 1.06224    | 298            | -1.05995        |
| <b>*NH<sub>2</sub></b>                          | -1016.32440     | 0.66859    | 298            | -1.71275        |
| <b>*NH<sub>3</sub></b>                          | -1021.78580     | 1.01474    | 298            | 1.51512         |

## Reference

- [1] T. Li, C. Tang, H. Guo, H. Wu, C. Duan, H. Wang, F. Zhang, Y. Cao, G. Yang, Y. Zhou, *ACS Appl. Mater. Interfaces* **2022**, *14*, 49765-49773.
- [2] E. Murphy, B. Sun, M. Rüscher, Y. Liu, W. Zang, S. Guo, Y. H. Chen, U. Hejral, Y. Huang, A. Ly, I. V. Zenyuk, X. Pan, J. Timoshenko, B. R. Cuenya, E. D. Spörke, P. Atanassov, *Adv. Mater.* **2024**, 2401133.
- [3] X. Fan, L. Xie, J. Liang, Y. Ren, L. Zhang, L. Yue, T. Li, Y. Luo, N. Li, B. Tang, Y. Liu, S. Gao, A. A. Alshehri, Q. Liu, Q. Kong, X. Sun, *Nano Research* **2021**, *15*, 3050-3055.
- [4] S. Qi, Z. Lei, Q. Huo, J. Zhao, T. Huang, N. Meng, J. Liao, J. Yi, C. Shang, X. Zhang, H. Yang, Q. Hu, C. He, *Adv. Mater.* **2024**, 2403958.
- [5] Z.-Y. Wu, M. Karamad, X. Yong, Q. Huang, D. A. Cullen, P. Zhu, C. Xia, Q. Xiao, M. Shakouri, F.-Y. Chen, J. Y. Kim, Y. Xia, K. Heck, Y. Hu, M. S. Wong, Q. Li, I. Gates, S. Siahrostami, H. Wang, *Nat. Commun.* **2021**, *12*, 2870.
- [6] P. Li, Z. Jin, Z. Fang, G. Yu, *Energy Environ. Sci.* **2021**, *14*, 3522-3531.
- [7] Z. Fang, Z. Jin, S. Tang, P. Li, P. Wu, G. Yu, *ACS Nano* **2021**, *16*, 1072-1081.
- [8] J. Wang, Y. Wang, C. Cai, Y. Liu, D. Wu, M. Wang, M. Li, X. Wei, M. Shao, M. Gu, *Nano Lett.* **2023**, *23*, 1897-1903.
- [9] S. Zhang, M. Li, J. Li, Q. Song, X. Liu, *Proc Natl Acad Sci USA* **2022**, *119*, 2115504119.
- [10] R. Zhang, Y. Guo, S. Zhang, D. Chen, Y. Zhao, Z. Huang, L. Ma, P. Li, Q. Yang, G. Liang, C. Zhi, *Adv. Energy Mater.* **2022**, *12*, 2103872.
- [11] G. Zhang, G. Wang, Y. Wan, X. Liu, K. Chu, *ACS Nano* **2023**, *17*, 21328-21336.
- [12] X. Zhao, Y. Jiang, M. Wang, S. Liu, Z. Wang, T. Qian, C. Yan, *Adv. Energy Mater.* **2023**, *13*, 2301409.
- [13] S. Zhang, J. Wu, M. Zheng, X. Jin, Z. Shen, Z. Li, Y. Wang, Q. Wang, X. Wang, H. Wei, J. Zhang, P. Wang, S. Zhang, L. Yu, L. Dong, Q. Zhu, H. Zhang, J. Lu, *Nat. Commun.* **2023**, *14*, 3634.
- [14] S. Sarkar, A. Adalder, S. Paul, S. Kapse, R. Thapa, U. K. Ghorai, *Appl. Catal. B: Environ.* **2024**, *343*, 123580.
- [15] D. F. Abbott, Y. Z. Xu, D. A. Kuznetsov, P. Kumar, C. R. Müller, A. Fedorov, V. Mougél, *Angew. Chem. Int. Ed.* **2023**, *62*, e202313746
